# Supplementary material
Source: PubMed Central journal article supplement (PMC5702684)
Supplement: 10.1074_M117.815365_jbc.M117.815365-1.pdf [file 10.1074_M117.815365_jbc.M117.815365-1.pdf]

## SUPPLEMENTAL DATA

### **A Simple and Versatile System for the ATP-dependent Assembly of Chromatin**

Mai T. Khuong, Jia Fei, and James T. Kadonaga

Supplemental Figures S1-S3  
Supplemental Table S1

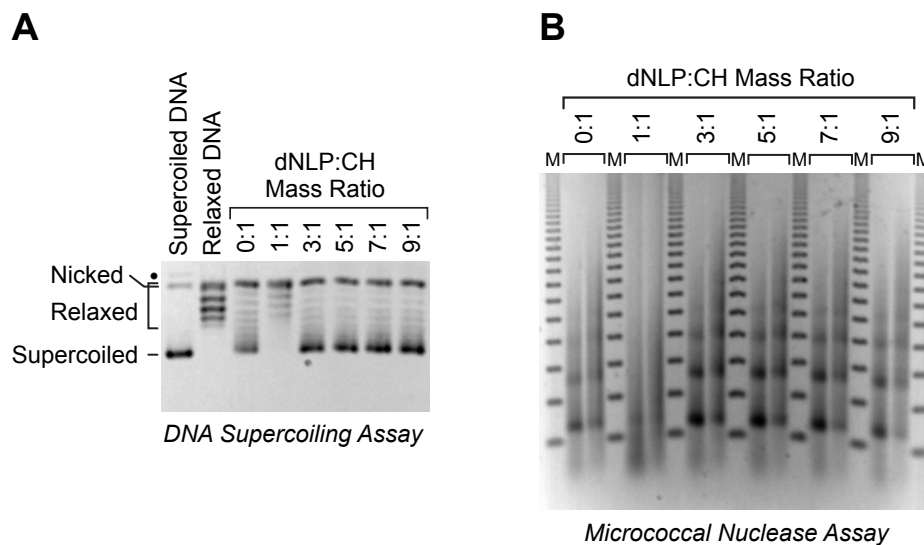

**Figure S1. Determination of the optimal dNLP to core histone mass ratio for chromatin assembly.**

Reactions were performed as in Fig. 1 of the main text with the indicated dNLP to core histone mass ratios. *A*, DNA supercoiling analysis. *B*, Partial MNase digestion analysis. Based on these results, a 5:1 mass ratio of dNLP to core histone octamers (which corresponds to roughly a 6:1 molar ratio of dNLP pentamers to histone octamers) was used throughout this work unless stated otherwise. The low efficiency of chromatin assembly at a 1:1 mass ratio of dNLP to core histones was consistently and reproducibly observed. The basis for this effect is not known.

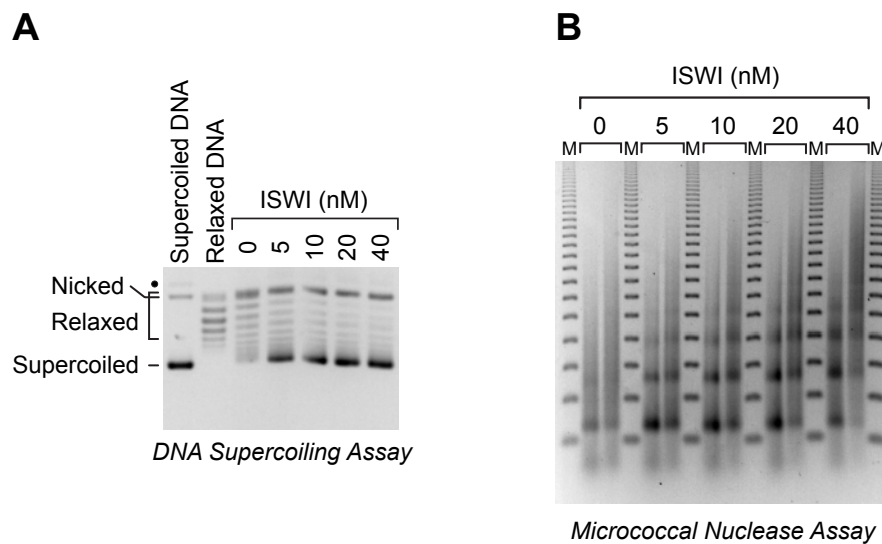

**Figure S2. Determination of the optimal ISWI concentration for chromatin assembly.** Reactions were performed as in Fig. 1 of the main text with the indicated concentrations of ISWI. *A*, DNA supercoiling analysis. *B*, Partial MNase digestion analysis. Based on these results, a concentration of 20 nM ISWI was used throughout this work unless stated otherwise.

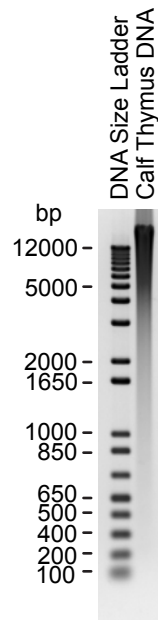

*0.8% Agarose Gel Electrophoresis  
Staining with Ethidium Bromide*

**Figure S3. Agarose gel electrophoresis of calf thymus genomic DNA.** Purified, unsheared calf thymus DNA (Millipore-Sigma; D4764-1UN) was analyzed by 0.8% agarose gel electrophoresis and staining with ethidium bromide.

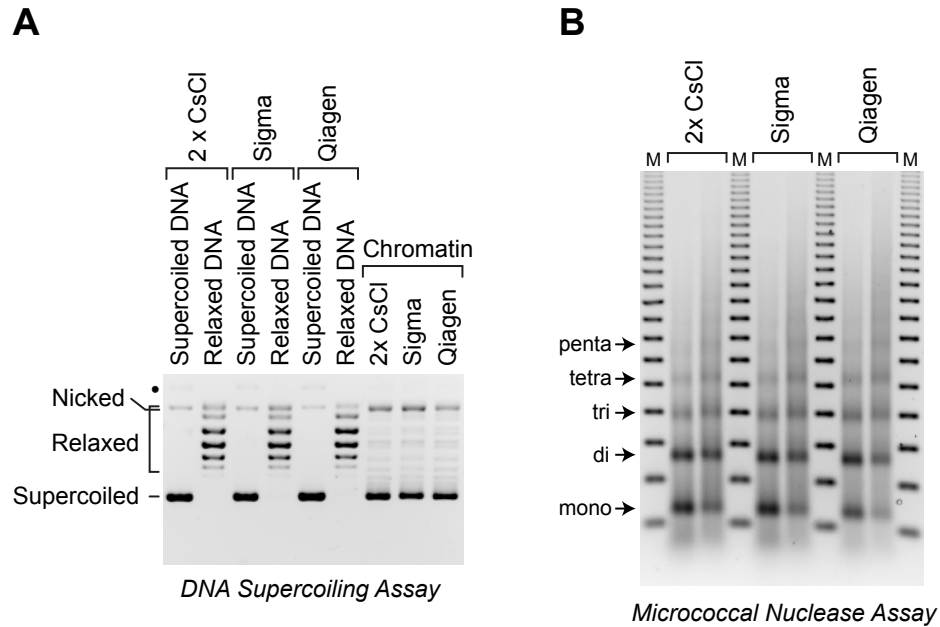

**Figure S4. Chromatin can be assembled with DNA prepared by different methods.**

Chromatin assembly reactions were performed as in Fig. 3 of the main text with plasmid pGIE-0 that was purified by three different methods: (1) two successive CsCl density gradient centrifugation steps; (2) the GenElute HP Plasmid Maxiprep Kit (Millipore Sigma; cat. no. NA0310); and (3) the HiSpeed Plasmid Maxi Kit (Qiagen; cat. no. 12662).

*A*, DNA supercoiling analysis. The reaction products were deproteinized, subjected to 0.8% agarose gel electrophoresis, and stained with ethidium bromide. For each method of DNA purification, samples of supercoiled DNA and relaxed DNA were included as references.

The positions of nicked DNA, relaxed DNA, and supercoiled DNA are shown. The black dot corresponds to a minor unknown contaminant, which may be supercoiled dimeric plasmid DNA.

*B*, Partial MNase digestion analysis. The reaction products were partially digested with two different concentrations of MNase, deproteinized, and subjected to 1.3% agarose gel electrophoresis. The resulting DNA fragments were detected by staining with ethidium bromide. The DNA bands that correspond to mono-, di-, tri-, tetra-, and penta-nucleosomes are shown. The DNA size markers (M) are the 123 bp ladder (Invitrogen).

**Table S1. Coding sequences in bacterial expression plasmids**

|                                  |                                                                                                                                                                                                                                                                                                                                                                                                                                                                                                                                                                                                                                                                                                                                                                                                                                                                                                                                                                                                                                                                                                                                                                                                                                                                                                                                                                                                                                                                                                                                                                                                                                                                                                                                                                                                                                                                                                                                                                                                                                                                                                                                                                                                                                                                                                                                                              |
|----------------------------------|--------------------------------------------------------------------------------------------------------------------------------------------------------------------------------------------------------------------------------------------------------------------------------------------------------------------------------------------------------------------------------------------------------------------------------------------------------------------------------------------------------------------------------------------------------------------------------------------------------------------------------------------------------------------------------------------------------------------------------------------------------------------------------------------------------------------------------------------------------------------------------------------------------------------------------------------------------------------------------------------------------------------------------------------------------------------------------------------------------------------------------------------------------------------------------------------------------------------------------------------------------------------------------------------------------------------------------------------------------------------------------------------------------------------------------------------------------------------------------------------------------------------------------------------------------------------------------------------------------------------------------------------------------------------------------------------------------------------------------------------------------------------------------------------------------------------------------------------------------------------------------------------------------------------------------------------------------------------------------------------------------------------------------------------------------------------------------------------------------------------------------------------------------------------------------------------------------------------------------------------------------------------------------------------------------------------------------------------------------------|
| <p>pET21-<br/>His6dNLP</p>       | <p>ATGCACCACCACCACCACCACCCCATGGCTGAGGAATCATTCTACGGAGTCACTTTGAC<br/> CGCCGAGAGCGACAGCGTCACTGTTGGATGTAGACGAGGACTACGCACGCGGCCAGAAGC<br/> TGGTCATCAAACAGATCCTCTTGGGCGCCGAGGCCAAGGAAAACGAGTTCAACGTGGTC<br/> GAGGTGAACACACCCAAGGACTCCGTGCAAATTTCCATCGCCGTATTGAAGGCCGGAGA<br/> GACCCGCGCCGTCAATCCCGACGTGGAGTTCTACGAGTCGAAGGTGACGTTCAAGCTGA<br/> TCAAGGGCAGCGGACCCGTCTACATCCACGGGCACAACATCAAGGACGATGTGGAGGTG<br/> GTCGACATGGAGGAGGATGACGAGGAGGACGATGTGGCCGAGGACGAGGAGGACGAGCA<br/> CCCAAAGAAGCGCGCCAAGATCGAGAACGCCGCCGATGGTAAAAATGCCAAGAACAACA<br/> AGAAGAAGTAATGACTCGAG</p> <p><b>Histidine tag</b><br/> <i>Drosophila</i> dNLP coding region<br/> <b>Stop codons</b><br/> Restriction sites</p>                                                                                                                                                                                                                                                                                                                                                                                                                                                                                                                                                                                                                                                                                                                                                                                                                                                                                                                                                                                                                                                                                                                                                                                                                                                                                                                                                                                                                                                                                                                                                                                                                                                                    |
| <p>pET24-<br/>ISWI-<br/>iCBD</p> | <p>CATATGTCCAAAACAGATACAGCTGCCGTGGAGGCAACCGAAGAGAACTCGAACGAGAC<br/> GACTTCAGATGCGGCCACCAGTTCATCCGGTAAAAGGAGGCTGAGTTCGACAACAAAA<br/> TCGAGGCTGATCGCAGTAGGCGCTTTGATTTCTGCTAAAGCAGACGGAGATATTCACC<br/> CACTTCATGACTAACAGCGCTAAGAGTCCACGAAGCCTAAGGGTAGACCCAAGAAGAT<br/> CAAAGACAAGGACAAGGAAAAGGATGTGGCCGATCATCGTCATCGCAAGACAGAGCAGG<br/> AGGAGGATGAGGAGTTGCTGGCGGAAGACTCGGCCACCAAGGAGATCTTTCGCTTCGAT<br/> GCCTCACCCGCCTACATCAAAAAGTGGAGAGATGCGTGACTACCAGATTTCGCGGCCTTAA<br/> CTGGATGATTTTCGCTTTACGAAAATGGTATCAATGGAATTTCTGGCCGATGAAATGGGTC<br/> TAGGAAAGACCCTGCAGACCATATCTCTGCTGGGTTACCTCAAGCATTTCAAAAATCAA<br/> GCTGGACCACACATCGTCATCGTGCCAAAGTCAACGCTTCAGAATTGGGTAAATGAGTT<br/> TAAAAAGTGGTGTCTTCCCTCAGAGCCGTCTGCCTTATTGGTGACCAGGACACCCGTA<br/> ACACCTTCATTAGAGATGTGCTCATGCCTGGCGAGTGGGACGTTTGCCTGACCTCCTAT<br/> GAGATGTGTATCCGCGAGAAGTCTGTATTCAAGAAGTTCAACTGGCGCTATTTGGTCAT<br/> CGACGAGGCGCATCGTATCAAGAACGAGAAGTCAAGCTGTCGGAGATTCTGCGAGAGT<br/> TTAAGACCGCTAATCGTCTACTTATCACGGGTAATCCGCTGCAGAATAACCTCCACGAG<br/> CTGTGGGCCCTGCTTAATTTCTGCTGCCCGATGTGTTAATTCGTGAGGATTTTGA<br/> CGAATGGTTCAACACGAACACCTGCCTGGGTGACGATGCATTGATTACGCGTTTGCATG<br/> CCGTGCTGAAAACCTTCCCTGCTCCGTGCTTAAAGGCCGAAGTGGAGAAGCGTCTGAAG<br/> CCGAAGAAGGAGATGAAAATATTTGTGGGTCTATCCAAGATGCAACGCGACTGGTACAC<br/> CAAGGTGCTGCTTAAGGACATTGATGTAGTGAACGGTGTGGCAAAGTGGAGAAGATGC<br/> GACTGCAGAACATCCTTATGCAGCTCCGCAAGTGCACCAACCACCCATATTTGTTTGTAT<br/> GGCGCCGAGCCCGGTCCGCCATACACCACGGACACGCATTTGGTGTATAACTCCGAAA<br/> GATGGCTATTTCTGGACAAGCTGCTGCCAAGCTCCAAGAGCAGGGATCGCGTGTGTTGA<br/> TTTTCTCACAAATGACGAGGATGTTGGATATCCTCGAGGACTACTGTCACTGGCGCAAC<br/> TACAACTATTGCCGCTGGATGGTCAGACGCCGCACGAAGATCGTAACAGGCAGATTCA<br/> GGAATTTAACATGGACAACAGCGCCAAGTTTCTCTTCATGTTGTCCACCCGAGCCGGTG<br/> GTTTGGGTATCAATTTGGCTACCGCTGATGTTGTCATCATTTACGACTCGGATTGGAAT<br/> CCTCAAATGGATTTGCAAGCTATGGATCGTGCTCATCGTATTGGTCAAAGAAGCAAGT<br/> GCGCGTTTTCCGGCTGATCACCGAAAGTACAGTGGAGGAGAAGATCGTGGAGAGAGCAG<br/> AGGTCAAGCTCCGTCTGGACAAGATGGTCATCCAGGGGGGCAGATTGGTTGACAACCGC<br/> TCCAATCAGTTGAACAAGGATGAAATGCTTAATATAATCCGTTTTGGAGCTAACCAAGT<br/> GTTGAGCTCTAAGGAGACAGACATTACCGATGAGGACATCGATGTTATTTTGGAGCGCG<br/> GTGAGGCCAAGACGGCCGAGCAAAAGGCAGCACTGGACAGTCTGGCGGAGAGTTTCGCTG<br/> CGGACGTTTCAATGGACACAAACGGCGAGGACGGAAGTCTTCCGTATATCAATTCGA<br/> GGGTGAGGATTTGGCGCGAGAAGCAAAAGCTAAATGCGCTGGGCAACTGGATCGAGCCAC</p> |

CGAAGCGTGAACGCAAAGCCAACCTATGCTGTGGATGCCTATTTCCGCGAGGCTCTCCGT  
GTCTCCGAACCCAAGGCACCGAAGGCTCCCCGCCACCCAAGCAGCCTATCGTTCAGGA  
CTTTCAGTTCTTCCCACCCCGTCTGTTTGAGCTGCTCGACCAGGAAATCTACTATTTCC  
GCAAGACTGTTGGTTACAAGGTGCCAAGAACACGGAAGTAGGATCGGATGCCACCAAA  
GTGCAGCGCGAGGAGCAGCGCAAGATCGATGAGGCAGAGCCGCTTACCGAGGAAGAGAT  
CCAGGAGAAGGAGAATCTACTCTCACAGGGTTTCACTGCCTGGACCAAGCGCGATTTCA  
ACCAGTTCATCAAGGCTAACGAAAAGTACGGTCGGGATGATATTGACAACATTGCCAAG  
GACGTGGAGGGCAAGACTCCGGAGGAGGTTATCGAGTACAACGCCGTGTTTTGGGAGCG  
ATGCACTGAGTTGCAGGATATTGAGCGAATAATGGGACAGATTGAGCGTGGAGAGGGCA  
AGATTC AACGCGCATTGTCTATTAAGAAGGCTTTGGATCAAAAAGATGTCGCGGTATCGC  
GCCCCCTTCCATCAGTTGCGGCTGCAATATGGTAATAACAAGGGCAAGAATTACACTGA  
AATAGAGGATCGCTTCTGGTATGCATGCTTCACAAGTTGGGCTTTGACAAGGAGAATG  
TCTACGAAGAGCTGCGAGCGGCTATAAGAGCTTCTCCGCAATTCGGCTTTGACTGGTTC  
ATCAAATCTAGAACCGCTTTGGAGCTACAGCGTCGCTGCAACACGTTGATTACCCTTAT  
TGAACGTGAAAACATTGAGCTGGAAGAGAAAAGACGCGCCGAGAAAAAGAAAAGGCAC  
CAAAGGGCAGCGTGTCCGCTGGAAGTGGAAGTGCCAGCTCGAACACTCCAGCACCCGCG  
CCCCAACCGAAGGCCAGTCAAAAAGCGGAAGAGCGAGGTGGTGGCAACCAGTTCACACTC  
GAAAAAGAAGAAGAAGCATATGGGGTGCTTTGCCAAGGGTACCAATGTTTTAATGGCGG  
ATGGGTCTATTGAATGTATTGAAAACATTGAGGTTGGTAATAAGGTCATGGGTAAAGAT  
GGCAGACCTCGTGAGGTAATTAATTTGCCAGAGGAAGAGAACTATGTACAGCGTCGT  
GCAGAAAAGTCAGCACAGAGCCACAAAAGTGACTCAAGTCGTGAAGTGCCAGAATTAC  
TCAAGTTTACGTGTAATGCGACCCATGAGTTGGTTGTTAGAACACCTCGTAGTGTCCGC  
CGTTTGTCTCGTACCATTAAGGGTGTGCAATATTTTGAAGTTATTACTTTTGAGATGGG  
CCAAAAGAAAGCCCCGACGGTAGAATTGTTGAGCTTGCAAGGAAGTTCAAAGAGCT  
ACCCAATATCTGAGGGGCTGAGAGAGCCAACGAATTAGTAGAATCCTATAGAAAGGCT  
TCAAATAAAGCTTATTTTGAAGTGGACTATTGAGGCCAGAGATCTTCTCTGTTGGGTTC  
CCATGTTGTAAGCTACCTACCAGACTTACGCTCCAATCTTTATGAGAATGACCACT  
TTTTCGACTACATGCAAAAAGTAAGTTTCATCTCACCATTGAAGGTCCAAAAGTACTT  
GCTATTTACTTGGTTTATGGATTGGTGTGATTGTCTGACAGGGCAACTTTTTCGGT  
TGATTCCAGAGATACTTCTTTGATGGAACGTGTTACTGAATATGCTGAAAAGTTGAATT  
TGTGCGCCGAGTATAAGGACAGAAAAGAACCACAAGTTGCCAAAACCTGTTAATTTGTAC  
TCTAAAGTTGTCAGAGGTAATGGTATTCGCAATAATCTTAATACTGAGAATCCATTATG  
GGACGCTATTGTTGGCTTAGGATTCTTGAAGGACGGTGTCAAAAATATTCCCTCTTTCT  
TGTCTACGGACAATATCGGTACTCGTGAAACATTTCTTGCTGGTCTAATTGATTCTGAT  
GGCTATGTTACTGATGAGCATGGTATTAAGCAACAATAAAGACAATTCATACTTCTGT  
CAGAGATGGTTTGGTTTCCCTTGCTCGTTCTTTAGGCTTAGTAGTCTCGGTTAACGCAG  
AACCTGCTAAGGTTGACATGAATGTCACCAAACATAAAAATTAGTTATGCTATTTATATG  
TCTGGTGGAGATGTTTTGCTTAACGTTCTTTCGAAGTGTGCCGGCTCTAAAAAATTCAG  
GCCTGCTCCCGCGCTGCTTTTGCACGTGAGTGCCGCGGATTTTATTTGAGTTACAAG  
AATTGAAGGAAGACGATTATTATGGGATTACTTTATCTGATGATTCTGATCATCAGTTT  
TTGCTTGGATCCCAGGTTGTCGTCCATGCATGCGGTGGCCTGACCGGTCTGAACTCAGG  
CCTCACGACAAATCCTGGTGTATCCGCTTGGCAGGTCAACACAGCTTATACTGCGGGAC  
AATTGGTTCATATAACGGCAAGACGTATAAATGTTTGCAGCCCCACACCTCCTTGGCA  
GGATGGGAACCATCCAACGTTCTGCCTTGTGGCAGCTTCAA**TGA**

*Drosophila* ISWI coding region

Combined Sce VMA intein and chitin binding domain (iCBD)  
coding region

**Stop codon**

Restriction sites

pET24-  
H1.0

CATATGACCGAGAATTCCACGTCCGCCCTGCGGCCAAGCCCAAGCGGGCCAAGGCCTC  
CAAGAAGTCCACAGACCACCCCAAGTATTCAGACATGATCGTGGCTGCCATCCAGGCCG  
AGAAGAACCGCGCTGGCTCCTCGCGCCAGTCCATTGAGAAATATCAAGAGCCACTAC  
AAGGTGGGTGAGAACGCTGACTCGCAGATCAAGTTGTCCATCAAGCGCCTGGTCACCAC  
CGGTGTCCTCAAGCAGACCAAGGGGTGGGGGCCTCGGGGTCCTTCCGGCTAGCCAAGA  
GCGACGAACCCCAAGAAGTCAGTGGCCTTCAAGAAGACCAAGAAGGAAATCAAGAAGGTA  
GCCACGCCAAAGAAGGCATCCAAGCCCAAGAAGGCTGCCTCCAAGCCCCAACCAAGAA  
ACCCAAAGCCACCCCGGTCAAGAAGGCCAAGAAGAAGCTGGCTGCCACGCCCAAGAAAG  
CCAAAAACCCAAGACTGTCAAAGCCAAGCCGGTCAAGGCATCCAAGCCCCAAAAAGGCC  
AAACCAGTGAAACCCAAAGCAAAGTCCAGTGCCAAGAGGGCCGCAAGAAGAAG**TGATA**  
**ATAG**AAGCTT

Human histone H1.0 coding region

**Stop codons**

Restriction sites
